# Supplementary material
Source: PubMed Central journal article supplement (PMC3753865)
Supplement: MCB.00150-13_zmb999100117so1.pdf [file MCB.00150-13_zmb999100117so1.pdf]

**Supplementary Table 1**

**Gene Ontology (GO) Categories of Induced Genes**

(Highlighted GO classes are associated with the uniquely induced BDNF + Dex induced genes. Fold enrichment of actual over expected probes sets is shown. The number of associated genes is in parentheses.)

| Classes                                                                         | Dex-Induced | BDNF-Induced | BDNF+Dex -Induced (Total) | BDNF+Dex -Induced (Unique) |
|---------------------------------------------------------------------------------|-------------|--------------|---------------------------|----------------------------|
| GO:0000122~negative regulation of transcription from RNA polymerase II promoter |             |              | 2.0                       | 2.4                        |
| GO:0000165~MAPKKK cascade                                                       |             | 2.7          | 2.0                       |                            |
| GO:0000186~activation of MAPKK activity                                         |             | 5.5          |                           |                            |
| GO:0000188~inactivation of MAPK activity                                        |             | 11.1         |                           |                            |
| GO:0001501~skeletal system development                                          |             | 3.1          | 1.7                       |                            |
| GO:0001503~ossification                                                         |             | 3.8          |                           |                            |
| GO:0001558~regulation of cell growth                                            | 2.7         |              | 2.1                       |                            |
| GO:0001568~blood vessel development                                             |             | 2.3          | 2.0                       | 2.2                        |
| GO:0001570~vasculogenesis                                                       |             | 4.6          | 4.0                       | 4.9                        |
| GO:0001649~osteoblast differentiation                                           |             | 5.0          |                           |                            |
| GO:0001655~urogenital system development                                        |             | 3.2          | 2.2                       |                            |
| GO:0001656~metanephros development                                              |             | 5.1          |                           |                            |
| GO:0001657~ureteric bud development                                             |             | 5.2          |                           |                            |
| GO:0001701~in utero embryonic development                                       |             | 2.2          | 1.8                       |                            |
| GO:0001708~cell fate specification                                              |             | 3.8          |                           |                            |
| GO:0001763~morphogenesis of a branching structure                               |             | 4.4          |                           |                            |
| GO:0001822~kidney development                                                   |             | 3.0          | 2.4                       |                            |
| GO:0001838~embryonic epithelial tube formation                                  |             | 4.6          |                           |                            |
| GO:0001841~neural tube formation                                                |             | 4.1          |                           |                            |
| GO:0001843~neural tube closure                                                  |             | 5.2          |                           |                            |
| GO:0001890~placenta development                                                 |             | 2.9          | 2.3                       |                            |
| GO:0001892~embryonic placenta development                                       |             | 3.8          |                           |                            |
| GO:0001944~vasculature development                                              |             | 2.3          | 2.1                       | 2.4                        |
| GO:0002009~morphogenesis of an epithelium                                       |             | 3.7          |                           |                            |
| GO:0002053~positive regulation of mesenchymal cell proliferation                |             | 7.9          |                           |                            |
| GO:0002237~response to molecule of bacterial origin                             | 3.1         | 3.2          |                           |                            |
| GO:0003002~regionalization                                                      |             |              | 2.2                       |                            |
| GO:0003006~reproductive developmental process                                   |             | 2.3          |                           |                            |
| GO:0003013~circulatory system process                                           |             |              |                           | 2.7 (9)                    |
| GO:0006071~glycerol metabolic process                                           | 10.7        |              |                           |                            |
| GO:0006275~regulation of DNA replication                                        |             | 4.4          |                           |                            |
| GO:0006350~transcription                                                        | 1.7         | 1.6          | 1.4                       |                            |
| GO:0006355~regulation of transcription, DNA-dependent                           |             |              | 1.5                       | 1.6                        |
| GO:0006357~regulation of transcription from RNA polymerase II promoter          |             | 1.6          | 1.7                       | 1.7                        |
| GO:0006468~protein amino acid phosphorylation                                   | 1.8         |              | 1.6                       | 1.7                        |
| GO:0006469~negative regulation of protein kinase activity                       |             | 4.8          | 2.7                       |                            |
| GO:0006470~protein amino acid dephosphorylation                                 |             |              | 2.2                       |                            |
| GO:0006541~glutamine metabolic process                                          |             |              | 4.9                       |                            |
| GO:0006606~protein import into nucleus                                          |             | 3.5          |                           |                            |
| GO:0006692~prostanoid metabolic process                                         |             |              | 4.9                       |                            |
| GO:0006693~prostaglandin metabolic process                                      |             |              | 4.9                       |                            |
| GO:0006790~sulfur metabolic process                                             | 3.1         |              |                           |                            |
| GO:0006793~phosphorus metabolic process                                         | 1.6         | 1.4          | 1.5                       | 1.8                        |
| GO:0006796~phosphate metabolic process                                          | 1.6         | 1.4          | 1.5                       | 1.8                        |
| GO:0006829~zinc ion transport                                                   |             |              |                           | 8.2 (3)                    |
| GO:0006875~cellular metal ion homeostasis                                       | 2.6         |              |                           |                            |
| GO:0006915~apoptosis                                                            | 2.0         |              |                           |                            |

|                                                                                     |     |     |     |          |
|-------------------------------------------------------------------------------------|-----|-----|-----|----------|
| GO:0006917~induction of apoptosis                                                   | 2.7 |     | 1.7 |          |
| GO:0006928~cell motion                                                              |     | 2.1 |     |          |
| GO:0006940~regulation of smooth muscle contraction                                  |     |     | 3.3 | 5.8      |
| GO:0007010~cytoskeleton organization                                                |     | 1.8 |     |          |
| GO:0007155~cell adhesion                                                            |     | 2.1 |     |          |
| GO:0007156~homophilic cell adhesion                                                 |     | 3.4 |     |          |
| GO:0007166~cell surface receptor linked signal transduction                         |     | 1.6 | 1.6 |          |
| GO:0007167~enzyme linked receptor protein signaling pathway                         | 2.5 | 2.7 | 2.4 | 2.3      |
| GO:0007169~transmembrane receptor protein tyrosine kinase signaling pathway         |     | 2.5 | 2.4 | 2.6      |
| GO:0007178~transmembrane receptor protein serine/threonine kinase signaling pathway |     | 3.1 | 2.8 |          |
| GO:0007179~transforming growth factor beta receptor signaling pathway               | 6.2 | 4.0 | 4.0 |          |
| GO:0007186~G-protein coupled receptor protein signaling pathway                     |     |     | 1.5 |          |
| GO:0007204~elevation of cytosolic calcium ion concentration                         | 3.9 |     |     |          |
| GO:0007218~neuropeptide signaling pathway                                           |     | 3.2 |     |          |
| GO:0007242~intracellular signaling cascade                                          | 2.0 | 1.6 | 1.5 | 1.5      |
| GO:0007243~protein kinase cascade                                                   | 2.4 | 1.9 | 1.6 |          |
| GO:0007267~cell-cell signaling                                                      |     | 2.4 |     |          |
| GO:0007268~synaptic transmission                                                    |     | 2.3 |     |          |
| GO:0007389~pattern specification process                                            |     | 2.0 | 2.0 | 2.4      |
| GO:0007409~axonogenesis                                                             |     |     |     | 2.3 (9)  |
| GO:0007423~sensory organ development                                                |     |     |     | 2.3 (11) |
| GO:0007507~heart development                                                        | 2.7 |     | 1.8 |          |
| GO:0007548~sex differentiation                                                      |     | 2.5 |     |          |
| GO:0007565~female pregnancy                                                         |     | 3.1 | 2.6 |          |
| GO:0007610~behavior                                                                 |     | 2.0 |     |          |
| GO:0007611~learning or memory                                                       |     | 3.4 |     |          |
| GO:0007613~memory                                                                   |     | 3.6 |     |          |
| GO:0007623~circadian rhythm                                                         |     | 3.9 |     |          |
| GO:0008015~blood circulation                                                        |     |     |     | 2.7 (9)  |
| GO:0008284~positive regulation of cell proliferation                                |     | 2.5 | 1.6 |          |
| GO:0008285~negative regulation of cell proliferation                                | 2.4 | 2.7 | 2.0 |          |
| GO:0008361~regulation of cell size                                                  | 2.5 | 2.1 | 1.8 |          |
| GO:0009101~glycoprotein biosynthetic process                                        |     | 2.7 |     |          |
| GO:0009266~response to temperature stimulus                                         |     | 2.7 |     |          |
| GO:0009611~response to wounding                                                     |     | 1.9 |     |          |
| GO:0009612~response to mechanical stimulus                                          |     | 5.1 | 3.2 |          |
| GO:0009617~response to bacterium                                                    |     | 2.4 |     |          |
| GO:0009628~response to abiotic stimulus                                             | 2.0 | 1.9 | 1.6 |          |
| GO:0009636~response to toxin                                                        |     | 3.6 |     |          |
| GO:0009719~response to endogenous stimulus                                          | 1.9 | 2.2 | 1.6 |          |
| GO:0009725~response to hormone stimulus                                             | 2.0 | 2.4 | 1.7 |          |
| GO:0009792~embryonic development ending in birth or egg hatching                    |     | 2.2 | 1.9 | 2.1      |
| GO:0009890~negative regulation of biosynthetic process                              |     | 2.0 | 1.6 |          |
| GO:0009891~positive regulation of biosynthetic process                              | 1.7 | 2.0 | 1.6 |          |
| GO:0009952~anterior/posterior pattern formation                                     |     |     | 2.2 | 2.7      |
| GO:0009967~positive regulation of signal transduction                               |     |     | 1.6 |          |
| GO:0009968~negative regulation of signal transduction                               |     |     | 2.0 | 2.9      |
| GO:0010033~response to organic substance                                            | 1.5 | 1.9 | 1.3 |          |
| GO:0010464~regulation of mesenchymal cell proliferation                             |     | 7.5 |     |          |
| GO:0010557~positive regulation of macromolecule biosynthetic process                | 1.6 | 2.1 | 1.7 |          |
| GO:0010558~negative regulation of macromolecule biosynthetic process                |     | 2.0 | 1.6 |          |
| GO:0010562~positive regulation of phosphorus metabolic process                      |     | 2.7 |     |          |
| GO:0010604~positive regulation of macromolecule metabolic process                   | 1.7 | 1.9 | 1.7 | 1.5      |
| GO:0010605~negative regulation of macromolecule metabolic process                   |     | 1.6 | 1.3 |          |

|                                                                                     |      |      |      |          |
|-------------------------------------------------------------------------------------|------|------|------|----------|
| GO:0010628~positive regulation of gene expression                                   | 1.9  | 2.1  | 1.9  |          |
| GO:0010629~negative regulation of gene expression                                   |      | 1.8  | 1.5  |          |
| GO:0010647~positive regulation of cell communication                                |      |      | 1.6  |          |
| GO:0010648~negative regulation of cell communication                                |      |      | 2.2  | 2.7      |
| GO:0010720~positive regulation of cell development                                  |      |      | 2.5  | 3.1      |
| GO:0010941~regulation of cell death                                                 | 1.7  | 1.6  |      |          |
| GO:0010942~positive regulation of cell death                                        | 2.2  |      |      |          |
| GO:0012501~programmed cell death                                                    | 2.0  |      |      |          |
| GO:0012502~induction of programmed cell death                                       | 2.7  |      | 1.7  |          |
| GO:0014020~primary neural tube formation                                            |      | 5.0  |      |          |
| GO:0014031~mesenchymal cell development                                             |      | 5.2  |      |          |
| GO:0014032~neural crest cell development                                            |      | 5.5  |      |          |
| GO:0014033~neural crest cell differentiation                                        |      | 5.5  |      |          |
| GO:0014070~response to organic cyclic substance                                     |      | 2.6  |      |          |
| GO:0016202~regulation of striated muscle tissue development                         |      | 6.6  | 3.1  |          |
| GO:0016310~phosphorylation                                                          | 1.6  |      | 1.4  |          |
| GO:0016311~dephosphorylation                                                        |      |      | 2.1  |          |
| GO:0016331~morphogenesis of embryonic epithelium                                    |      | 4.5  |      |          |
| GO:0016337~cell-cell adhesion                                                       |      | 2.9  |      |          |
| GO:0016477~cell migration                                                           |      | 2.0  |      |          |
| GO:0016481~negative regulation of transcription                                     |      | 1.9  | 1.7  |          |
| GO:0017015~regulation of transforming growth factor beta receptor signaling pathway |      |      | 3.9  |          |
| GO:0019220~regulation of phosphate metabolic process                                |      | 2.2  | 1.5  |          |
| GO:0019226~transmission of nerve impulse                                            |      | 2.0  |      |          |
| GO:0019229~regulation of vasoconstriction                                           | 6.4  |      | 4.7  |          |
| GO:0019400~alditol metabolic process                                                | 9.0  |      |      |          |
| GO:0019932~second-messenger-mediated signaling                                      | 3.4  |      | 1.9  |          |
| GO:0019933~cAMP-mediated signaling                                                  | 4.6  |      |      |          |
| GO:0019935~cyclic-nucleotide-mediated signaling                                     | 4.2  |      |      |          |
| GO:0021537~telencephalon development                                                |      |      | 2.6  | 3.7      |
| GO:0021546~rhombomere development                                                   |      |      | 10.4 |          |
| GO:0021872~generation of neurons in the forebrain                                   |      |      |      | 9.4 (3)  |
| GO:0021879~forebrain neuron differentiation                                         |      |      |      | 11.0 (3) |
| GO:0021915~neural tube development                                                  |      | 4.1  |      |          |
| GO:0021936~regulation of granule cell precursor proliferation                       |      | 11.1 |      |          |
| GO:0021940~positive regulation of granule cell precursor proliferation              |      | 11.1 |      |          |
| GO:0021952~central nervous system projection neuron axonogenesis                    |      | 9.1  |      |          |
| GO:0022604~regulation of cell morphogenesis                                         |      |      | 2.0  |          |
| GO:0022610~biological adhesion                                                      |      | 2.1  |      |          |
| GO:0022612~gland morphogenesis                                                      |      | 3.6  |      |          |
| GO:0030001~metal ion transport                                                      | 1.8  |      | 1.5  |          |
| GO:0030029~actin filament-based process                                             |      | 2.4  |      |          |
| GO:0030030~cell projection organization                                             |      | 1.7  |      |          |
| GO:0030036~actin cytoskeleton organization                                          |      | 2.3  |      |          |
| GO:0030111~regulation of Wnt receptor signaling pathway                             |      |      | 3.6  | 5.0      |
| GO:0030178~negative regulation of Wnt receptor signaling pathway                    |      |      | 4.7  | 8.0      |
| GO:0030182~neuron differentiation                                                   |      |      |      | 1.8 (17) |
| GO:0030202~heparin metabolic process                                                | 57.3 |      |      |          |
| GO:0030203~glycosaminoglycan metabolic process                                      | 5.1  |      |      |          |
| GO:0030278~regulation of ossification                                               |      | 4.3  | 2.4  | 3.9      |
| GO:0030282~bone mineralization                                                      |      | 11.1 |      |          |
| GO:0030308~negative regulation of cell growth                                       | 3.6  |      |      |          |
| GO:0030323~respiratory tube development                                             |      | 3.1  | 2.1  |          |
| GO:0030324~lung development                                                         |      | 3.1  |      |          |

|                                                                 |     |      |     |          |
|-----------------------------------------------------------------|-----|------|-----|----------|
| GO:0030326~embryonic limb morphogenesis                         |     | 4.0  |     |          |
| GO:0030334~regulation of cell migration                         |     | 3.3  | 1.9 |          |
| GO:0030335~positive regulation of cell migration                |     | 2.7  |     |          |
| GO:0030336~negative regulation of cell migration                |     | 5.6  | 3.1 |          |
| GO:0030431~sleep                                                |     |      | 8.3 |          |
| GO:0030574~collagen catabolic process                           |     | 10.0 |     |          |
| GO:0030879~mammary gland development                            |     | 3.5  |     | 3.1      |
| GO:0031128~developmental induction                              |     |      | 6.5 | 8.2      |
| GO:0031175~neuron projection development                        |     |      |     | 2.1 (12) |
| GO:0031214~biomineral formation                                 |     | 6.1  | 3.8 |          |
| GO:0031327~negative regulation of cellular biosynthetic process |     | 2.1  | 1.7 |          |
| GO:0031328~positive regulation of cellular biosynthetic process | 1.7 | 2.0  | 1.6 |          |
| GO:0031344~regulation of cell projection organization           |     |      |     | 2.8      |
| GO:0031346~positive regulation of cell projection organization  |     |      |     | 3.7      |
| GO:0031644~regulation of neurological system process            |     | 2.8  | 2.0 |          |
| GO:0031960~response to corticosteroid stimulus                  | 4.8 | 3.9  | 2.9 |          |
| GO:0032147~activation of protein kinase activity                |     | 3.0  |     |          |
| GO:0032496~response to lipopolysaccharide                       | 3.4 | 3.5  |     |          |
| GO:0032535~regulation of cellular component size                | 2.2 | 2.1  |     |          |
| GO:0032570~response to progesterone stimulus                    |     |      | 6.0 | 8.5      |
| GO:0033673~negative regulation of kinase activity               |     | 4.5  | 2.6 |          |
| GO:0034097~response to cytokine stimulus                        | 3.6 | 3.2  |     |          |
| GO:0034504~protein localization in nucleus                      |     | 3.1  |     |          |
| GO:0035107~appendage morphogenesis                              |     | 3.5  |     |          |
| GO:0035108~limb morphogenesis                                   |     | 3.5  |     |          |
| GO:0035113~embryonic appendage morphogenesis                    |     | 4.0  |     |          |
| GO:0035148~tube lumen formation                                 |     | 4.3  |     |          |
| GO:0035239~tube morphogenesis                                   |     | 4.0  | 2.2 |          |
| GO:0035282~segmentation                                         |     | 4.7  |     |          |
| GO:0035295~tube development                                     |     | 3.5  | 2.2 |          |
| GO:0040007~growth                                               |     | 2.4  |     |          |
| GO:0040008~regulation of growth                                 | 2.3 |      | 1.6 |          |
| GO:0040012~regulation of locomotion                             |     | 3.2  |     |          |
| GO:0040013~negative regulation of locomotion                    |     | 5.2  | 2.8 |          |
| GO:0040017~positive regulation of locomotion                    |     | 2.8  |     |          |
| GO:0042063~gliogenesis                                          |     | 3.8  |     |          |
| GO:0042127~regulation of cell proliferation                     | 2.0 | 2.3  | 1.6 |          |
| GO:0042325~regulation of phosphorylation                        |     | 2.2  |     |          |
| GO:0042445~hormone metabolic process                            |     | 2.5  |     |          |
| GO:0042471~ear morphogenesis                                    |     |      | 2.8 | 4.3      |
| GO:0042472~inner ear morphogenesis                              |     | 3.8  |     |          |
| GO:0042981~regulation of apoptosis                              | 1.6 | 1.6  |     |          |
| GO:0043009~chordate embryonic development                       |     | 2.3  | 1.8 | 2.1      |
| GO:0043065~positive regulation of apoptosis                     | 2.3 |      |     |          |
| GO:0043066~negative regulation of apoptosis                     |     | 1.9  |     |          |
| GO:0043067~regulation of programmed cell death                  | 1.7 | 1.6  |     |          |
| GO:0043068~positive regulation of programmed cell death         | 2.2 |      |     |          |
| GO:0043069~negative regulation of programmed cell death         |     | 1.9  |     |          |
| GO:0043086~negative regulation of catalytic activity            |     | 1.9  |     |          |
| GO:0043405~regulation of MAP kinase activity                    |     | 2.5  | 2.1 |          |
| GO:0043407~negative regulation of MAP kinase activity           |     | 5.7  | 3.6 |          |
| GO:0043434~response to peptide hormone stimulus                 |     | 2.5  |     |          |
| GO:0043549~regulation of kinase activity                        |     | 2.4  |     |          |
| GO:0043583~ear development                                      |     | 2.9  | 2.9 | 4.4      |

|                                                                                                         |     |      |     |      |
|---------------------------------------------------------------------------------------------------------|-----|------|-----|------|
| GO:0043627~response to estrogen stimulus                                                                |     |      | 1.9 | 2.8  |
| GO:0044057~regulation of system process                                                                 |     | 2.2  | 1.8 |      |
| GO:0044236~multicellular organismal metabolic process                                                   |     | 5.3  |     |      |
| GO:0045137~development of primary sexual characteristics                                                |     | 2.4  |     |      |
| GO:0045165~cell fate commitment                                                                         |     | 2.7  | 2.6 | 2.7  |
| GO:0045168~cell-cell signaling involved in cell fate specification                                      |     |      | 6.5 | 8.2  |
| GO:0045449~regulation of transcription                                                                  |     | 1.4  | 1.4 | 1.3  |
| GO:0045596~negative regulation of cell differentiation                                                  |     |      | 1.7 | 2.3  |
| GO:0045597~positive regulation of cell differentiation                                                  |     | 2.1  | 1.7 | 2.0  |
| GO:0045598~regulation of fat cell differentiation                                                       |     |      | 5.2 | 11.0 |
| GO:0045666~positive regulation of neuron differentiation                                                |     | 5.1  |     |      |
| GO:0045667~regulation of osteoblast differentiation                                                     |     | 4.0  |     |      |
| GO:0045669~positive regulation of osteoblast differentiation                                            |     | 5.5  |     |      |
| GO:0045740~positive regulation of DNA replication                                                       |     | 5.4  |     |      |
| GO:0045765~regulation of angiogenesis                                                                   |     |      | 3.1 |      |
| GO:0045766~positive regulation of angiogenesis                                                          |     |      | 4.6 | 6.5  |
| GO:0045767~regulation of anti-apoptosis                                                                 |     | 4.5  | 4.5 | 5.9  |
| GO:0045768~positive regulation of anti-apoptosis                                                        |     | 5.9  | 5.9 | 7.8  |
| GO:0045843~negative regulation of striated muscle development                                           |     | 10.0 |     |      |
| GO:0045859~regulation of protein kinase activity                                                        |     | 2.5  |     |      |
| GO:0045892~negative regulation of transcription, DNA-dependent                                          |     | 1.9  | 1.9 | 2.1  |
| GO:0045893~positive regulation of transcription, DNA-dependent                                          |     | 1.7  | 1.6 |      |
| GO:0045907~positive regulation of vasoconstriction                                                      |     |      | 4.9 |      |
| GO:0045926~negative regulation of growth                                                                | 3.4 |      | 2.2 |      |
| GO:0045933~positive regulation of muscle contraction                                                    |     |      | 4.3 | 7.3  |
| GO:0045934~negative regulation of nucleobase, nucleoside, nucleotide and nucleic acid metabolic process |     | 1.9  | 1.6 |      |
| GO:0045935~positive regulation of nucleobase, nucleoside, nucleotide and nucleic acid metabolic process | 1.8 | 2.1  | 1.8 |      |
| GO:0045937~positive regulation of phosphate metabolic process                                           |     | 2.7  |     |      |
| GO:0045941~positive regulation of transcription                                                         | 1.9 | 2.2  | 1.9 |      |
| GO:0045944~positive regulation of transcription from RNA polymerase II promoter                         |     | 2.0  | 1.7 |      |
| GO:0045987~positive regulation of smooth muscle contraction                                             |     |      | 4.9 | 8.3  |
| GO:0046620~regulation of organ growth                                                                   |     | 6.4  | 4.0 |      |
| GO:0046777~protein amino acid autophosphorylation                                                       |     |      |     | 3.5  |
| GO:0048008~platelet-derived growth factor receptor signaling pathway                                    |     |      | 4.9 |      |
| GO:0048146~positive regulation of fibroblast proliferation                                              |     | 4.9  |     |      |
| GO:0048167~regulation of synaptic plasticity                                                            |     | 4.5  | 2.6 |      |
| GO:0048168~regulation of neuronal synaptic plasticity                                                   |     | 4.7  |     |      |
| GO:0048511~rhythmic process                                                                             |     | 2.6  | 2.3 | 2.5  |
| GO:0048514~blood vessel morphogenesis                                                                   |     | 2.5  | 2.1 | 2.5  |
| GO:0048545~response to steroid hormone stimulus                                                         | 2.8 | 2.3  | 2.0 |      |
| GO:0048562~embryonic organ morphogenesis                                                                |     | 3.1  |     |      |
| GO:0048568~embryonic organ development                                                                  |     | 3.1  | 1.9 |      |
| GO:0048589~developmental growth                                                                         |     | 2.8  |     |      |
| GO:0048598~embryonic morphogenesis                                                                      |     | 2.7  | 1.7 | 1.9  |
| GO:0048608~reproductive structure development                                                           |     | 2.7  |     |      |
| GO:0048634~regulation of muscle development                                                             |     | 6.3  | 3.0 |      |
| GO:0048635~negative regulation of muscle development                                                    |     | 8.3  |     |      |
| GO:0048645~organ formation                                                                              |     | 11.1 |     |      |
| GO:0048660~regulation of smooth muscle cell proliferation                                               |     | 4.6  |     |      |
| GO:0048661~positive regulation of smooth muscle cell proliferation                                      |     | 5.0  |     |      |
| GO:0048666~neuron development                                                                           |     |      |     | 2.1  |
| GO:0048729~tissue morphogenesis                                                                         |     | 3.2  | 1.9 |      |
| GO:0048732~gland development                                                                            |     | 2.7  |     |      |
| GO:0048736~appendage development                                                                        |     | 3.7  |     |      |

|                                                                       |     |      |      |         |
|-----------------------------------------------------------------------|-----|------|------|---------|
| GO:0048745~smooth muscle tissue development                           |     | 9.1  |      |         |
| GO:0048754~branching morphogenesis of a tube                          |     | 4.6  |      |         |
| GO:0048762~mesenchymal cell differentiation                           |     | 5.8  |      |         |
| GO:0048812~neuron projection morphogenesis                            |     |      |      | 2.2     |
| GO:0048870~cell motility                                              |     | 1.9  |      |         |
| GO:0050767~regulation of neurogenesis                                 |     |      |      | 2.3     |
| GO:0050801~ion homeostasis                                            | 1.9 |      |      |         |
| GO:0050804~regulation of synaptic transmission                        |     | 3.1  | 2.1  |         |
| GO:0050877~neurological system process                                |     | 1.8  |      |         |
| GO:0050886~endocrine process                                          |     |      | 4.1  |         |
| GO:0050890~cognition                                                  |     | 1.7  |      |         |
| GO:0051094~positive regulation of developmental process               | 2.0 | 2.3  | 1.9  | 2.4     |
| GO:0051130~positive regulation of cellular component organization     |     |      |      | 2.3 (9) |
| GO:0051169~nuclear transport                                          |     |      | 2.0  |         |
| GO:0051170~nuclear import                                             |     | 3.3  | 2.8  |         |
| GO:0051172~negative regulation of nitrogen compound metabolic process |     | 1.9  | 1.7  |         |
| GO:0051173~positive regulation of nitrogen compound metabolic process | 1.8 | 2.0  | 1.7  |         |
| GO:0051174~regulation of phosphorus metabolic process                 |     | 2.2  | 1.5  |         |
| GO:0051216~cartilage development                                      |     | 3.6  |      |         |
| GO:0051252~regulation of RNA metabolic process                        |     |      | 1.5  | 1.6     |
| GO:0051253~negative regulation of RNA metabolic process               |     | 1.9  | 1.9  | 2.0     |
| GO:0051254~positive regulation of RNA metabolic process               |     | 1.8  | 1.7  |         |
| GO:0051270~regulation of cell motion                                  |     | 3.1  |      |         |
| GO:0051271~negative regulation of cell motion                         |     | 5.7  | 2.8  |         |
| GO:0051338~regulation of transferase activity                         |     | 2.3  |      |         |
| GO:0051348~negative regulation of transferase activity                |     | 4.3  | 2.7  |         |
| GO:0051384~response to glucocorticoid stimulus                        | 5.1 | 3.8  | 3.1  |         |
| GO:0051385~response to mineralocorticoid stimulus                     |     | 7.5  | 6.6  |         |
| GO:0051412~response to corticosterone stimulus                        |     | 7.4  | 8.1  |         |
| GO:0051480~cytosolic calcium ion homeostasis                          | 3.5 |      |      |         |
| GO:0051591~response to cAMP                                           |     | 5.4  | 3.3  |         |
| GO:0051674~localization of cell                                       |     | 1.9  |      |         |
| GO:0051726~regulation of cell cycle                                   | 2.3 | 2.3  | 1.9  |         |
| GO:0051960~regulation of nervous system development                   |     |      | 1.7  | 2.3     |
| GO:0051969~regulation of transmission of nerve impulse                |     | 2.9  | 2.1  |         |
| GO:0055021~regulation of cardiac muscle growth                        |     | 12.1 |      |         |
| GO:0055024~regulation of cardiac muscle tissue development            |     | 12.1 |      |         |
| GO:0055065~metal ion homeostasis                                      | 2.5 |      |      |         |
| GO:0060021~palate development                                         |     | 5.2  | 3.9  |         |
| GO:0060043~regulation of cardiac muscle cell proliferation            |     | 12.1 |      |         |
| GO:0060045~positive regulation of cardiac muscle cell proliferation   |     | 16.6 | 10.4 |         |
| GO:0060173~limb development                                           |     | 3.7  |      |         |
| GO:0060284~regulation of cell development                             |     |      | 1.7  | 2.2     |
| GO:0060348~bone development                                           |     | 3.7  |      |         |
| GO:0060395~SMAD protein signal transduction                           |     | 26.6 | 12.4 |         |
| GO:0060420~regulation of heart growth                                 |     | 11.1 |      |         |
| GO:0060429~epithelium development                                     |     | 3.2  |      |         |
| GO:0060485~mesenchyme development                                     |     | 5.6  |      |         |
| GO:0060512~prostate gland morphogenesis                               |     | 5.8  |      |         |
| GO:0060541~respiratory system development                             |     | 3.3  | 2.1  |         |
| GO:0060548~negative regulation of cell death                          |     | 1.9  |      |         |
| GO:0060562~epithelial tube morphogenesis                              |     | 4.4  |      |         |
| GO:0060602~branch elongation of an epithelium                         |     | 11.1 |      |         |
| GO:0060606~tube closure                                               |     | 5.2  |      |         |



**Supplementary Table 2**

**Gene Ontology (GO) Categories of Repressed Genes**

(Fold enrichment of actual over expected probes sets is shown)

| Classes                                                                                                 | Dex-Repressed | BDNF-Repressed | BDNF+Dex -Repressed (Total) | BDNF+Dex -Repressed (Unique) |
|---------------------------------------------------------------------------------------------------------|---------------|----------------|-----------------------------|------------------------------|
| GO:0000904~cell morphogenesis involved in differentiation                                               | 2.8           |                | 2.8                         |                              |
| GO:0001709~cell fate determination                                                                      | 2.4           |                | 2.4                         | 2.7                          |
| GO:0001764~neuron migration                                                                             | 8.4           |                | 8.4                         | 8.3                          |
| GO:0006350~transcription                                                                                | 5.0           |                | 5.0                         |                              |
| GO:0006355~regulation of transcription, DNA-dependent                                                   | 2.0           |                | 2.0                         | 2.0                          |
| GO:0006357~regulation of transcription from RNA polymerase II promoter                                  | 2.3           | 1.8            | 2.3                         | 2.0                          |
| GO:0006928~cell motion                                                                                  | 1.9           |                | 1.9                         |                              |
| GO:0007218~neuropeptide signaling pathway                                                               | 2.1           |                | 2.1                         |                              |
| GO:0007389~pattern specification process                                                                | 3.7           |                | 3.7                         |                              |
| GO:0007409~axonogenesis                                                                                 | 2.4           |                | 2.4                         |                              |
| GO:0007411~axon guidance                                                                                | 2.9           |                | 2.9                         | 3.1                          |
| GO:0009057~macromolecule catabolic process                                                              | 3.7           |                | 3.7                         |                              |
| GO:0009890~negative regulation of biosynthetic process                                                  |               | 2.8            |                             |                              |
| GO:0010558~negative regulation of macromolecule biosynthetic process                                    | 2.1           |                | 2.1                         |                              |
| GO:0010605~negative regulation of macromolecule metabolic process                                       | 2.2           |                | 2.2                         |                              |
| GO:0010628~positive regulation of gene expression                                                       | 1.7           |                | 1.7                         |                              |
| GO:0010629~negative regulation of gene expression                                                       | 1.8           |                | 1.8                         |                              |
| GO:0016051~carbohydrate biosynthetic process                                                            | 2.1           |                | 2.1                         |                              |
| GO:0016477~cell migration                                                                               |               | 5.9            |                             |                              |
| GO:0016481~negative regulation of transcription                                                         | 2.1           |                | 2.1                         |                              |
| GO:0021537~telencephalon development                                                                    | 2.3           |                | 2.3                         |                              |
| GO:0021543~pallium development                                                                          | 3.7           |                | 3.7                         |                              |
| GO:0021846~cell proliferation in forebrain                                                              | 3.8           |                | 3.8                         |                              |
| GO:0021954~central nervous system neuron development                                                    | 8.8           |                | 8.8                         |                              |
| GO:0030030~cell projection organization                                                                 | 5.1           |                | 5.1                         |                              |
| GO:0030182~neuron differentiation                                                                       | 1.8           |                | 1.8                         |                              |
| GO:0030900~forebrain development                                                                        | 2.1           |                | 2.1                         |                              |
| GO:0030968~endoplasmic reticulum unfolded protein response                                              | 2.6           |                | 2.6                         |                              |
| GO:0031175~neuron projection development                                                                | 7.6           |                | 7.6                         | 11.1                         |
| GO:0031327~negative regulation of cellular biosynthetic process                                         | 2.0           |                | 2.0                         |                              |
| GO:0032990~cell part morphogenesis                                                                      | 2.1           |                | 2.1                         |                              |
| GO:0034620~cellular response to unfolded protein                                                        | 2.2           |                | 2.2                         |                              |
| GO:0042490~mechanoreceptor differentiation                                                              | 7.6           |                | 7.6                         | 11.1                         |
| GO:0045165~cell fate commitment                                                                         | 6.3           |                | 6.3                         |                              |
| GO:0045449~regulation of transcription                                                                  | 3.0           |                | 3.0                         |                              |
| GO:0045597~positive regulation of cell differentiation                                                  | 2.1           |                |                             |                              |
| GO:0045664~regulation of neuron differentiation                                                         |               | 2.0            | 2.1                         | 1.9                          |
| GO:0045667~regulation of osteoblast differentiation                                                     | 1.9           |                | 1.9                         |                              |
| GO:0045892~negative regulation of transcription, DNA-dependent                                          | 2.5           |                | 2.5                         |                              |
| GO:0045893~positive regulation of transcription, DNA-dependent                                          |               | 9.8            |                             |                              |
| GO:0045934~negative regulation of nucleobase, nucleoside, nucleotide and nucleic acid metabolic process | 2.5           |                | 2.5                         | 2.5                          |
| GO:0045935~positive regulation of nucleobase, nucleoside, nucleotide and nucleic acid metabolic process | 1.9           |                | 1.9                         |                              |
| GO:0045941~positive regulation of transcription                                                         | 2.2           |                | 2.2                         |                              |
| GO:0048663~neuron fate commitment                                                                       | 1.5           |                | 1.5                         |                              |
| GO:0048666~neuron development                                                                           | 1.7           |                | 1.7                         |                              |
| GO:0048667~cell morphogenesis involved in neuron differentiation                                        | 5.1           |                | 5.1                         |                              |
| GO:0048812~neuron projection morphogenesis                                                              | 1.8           |                | 1.8                         |                              |
| GO:0048839~inner ear development                                                                        | 2.7           |                | 2.7                         | 2.8                          |



|                                                                       |     |     |     |     |
|-----------------------------------------------------------------------|-----|-----|-----|-----|
| GO:0048858~cell projection morphogenesis                              | 2.5 |     | 2.5 | 2.6 |
| GO:0048870~cell motility                                              | 3.3 |     | 3.3 |     |
| GO:0050767~regulation of neurogenesis                                 | 2.3 |     | 2.3 |     |
| GO:0051172~negative regulation of nitrogen compound metabolic process | 1.9 |     | 1.9 |     |
| GO:0051252~regulation of RNA metabolic process                        | 2.4 |     | 2.4 |     |
| GO:0051253~negative regulation of RNA metabolic process               | 2.2 |     | 2.2 |     |
| GO:0051254~positive regulation of RNA metabolic process               | 2.2 | 1.8 | 2.2 | 2.0 |
| GO:0051674~localization of cell                                       | 2.5 |     | 2.5 | 2.5 |
| GO:0051789~response to protein stimulus                               | 1.9 |     | 1.9 |     |
| GO:0051960~regulation of nervous system development                   | 1.9 |     | 1.9 |     |
| GO:0060284~regulation of cell development                             | 3.7 |     | 3.7 |     |

### Supplementary Table 3: Primers

#### qPCR

##### PRL3C1

Forward 5'-GTTCTCATCGCACCCATGTA-3'

Reverse 5'-TAGAAGTGGTGTGGCAGGTG-3'

##### FGF8

Forward 5'-ATGGCAGAAGACGGAGACC-3'

Reverse 5'-TTGCTCTTGGCGATTAGCTT-3'

##### MYOM2

Forward 5'-GCAAGTACCGGATTGAGAGC-3'

Reverse 5'-ATGGGGATTGTTGCTACTG-3'

##### NGFIB

Forward 5'-GGCATGGTGAAGGAAGTTGT-3'

Reverse 5'-GGGACGTGAGGAGATTGGTA-3'

##### AGTR1A

Forward 5'-GAGAGGATTCGTGGCTTGAG-3'

Reverse 5'-ACTCAGGGAATGTGGCAGAG-3'

##### SRGN

Forward 5'-GCATTGAGGAGAAAGGACCA-3'

Reverse 5'-CCGGAGCCAGAATAGTCATC-3'

##### ANGPTL1

Forward 5'-CCCTTTCAAGATTCCAGCAG-3'

Reverse 5'-GTGGCTGTTTTCGGGTTTAAT-3'

##### AVPR1A

Forward 5'-AAGCGCCTACATCCTTTGC-3'

Reverse 5'-GCCGTGATTGTGATGGAAG-3'

##### DUSP1

Forward 5'-AGGACAACCACAAGGCAGAC-3'

Reverse 5'-CACAAACACCCTTCCTCCAG-3'

##### IRX2

Forward 5'-ATCCAGACAAGGCACAGGAC-3'

Reverse 5'-GCAATTTCTCCCCATCTGAC-3'

##### PCDH20

Forward 5'-CATCTACATCGTCCCAGCAG-3'

Reverse 5'-CCACGAAGAGGAAAAGCAGA-3'

##### CRHBP

Forward 5'-TCCAATGCCACTTCACTCTG-3'

Reverse 5'-GAAAAGCAGGAAAGGGTCGT-3'

##### CRH

Forward 5'-AGAGAAAGGGGAAAGGCAAA-3'

Reverse 5'-GTTTAGGGGCGCTCTCTTC-3'

##### CRHR1

Forward 5'-GTCCCTGACCAGCAATGTTT-3'

Reverse 5'-TGTTGTAGCGGACCCGTA-3'

RPL19

Forward 5'-CACAAAGCTGAAGGCAGACAA-3'

Reverse 5'-GCGTGCTTCCTTGGTCTTAG-3'

hSGK1

Forward 5'-CCCCCTTTTAACCCAAATGT-3'

Reverse 5'-CAGGCTCTTCGGTAAACTCG-3'

hGILZ

Forward 5'-AATGCGGCCACGGATG-3'

Reverse 5'-GGACTTCACGTTTCAGTGGACA-3'

## **ChIP**

hSGK-1

Forward 5'-TACCTCCTCACGTGTTC-3'

Reverse 5'-GTCGTCTCTGCACTAAAGG-3'

hSGK\_6KB

Forward 5'-CTACTTCCCCACAAGTCCA-3'

Reverse 5'-CCACCAGAAATCCAGACTCC-3'

hGILZ-GL3

Forward 5'-GATACCAGTTAAGCTCCTGA-3'

Reverse 5'-AGGTGGGAGACAATAATGAT-3'
